# Supplementary material
Source: PubMed Central journal article supplement (PMC8755492)
Supplement: djab187_supplementary_data.pdf [file djab187_supplementary_data.pdf]

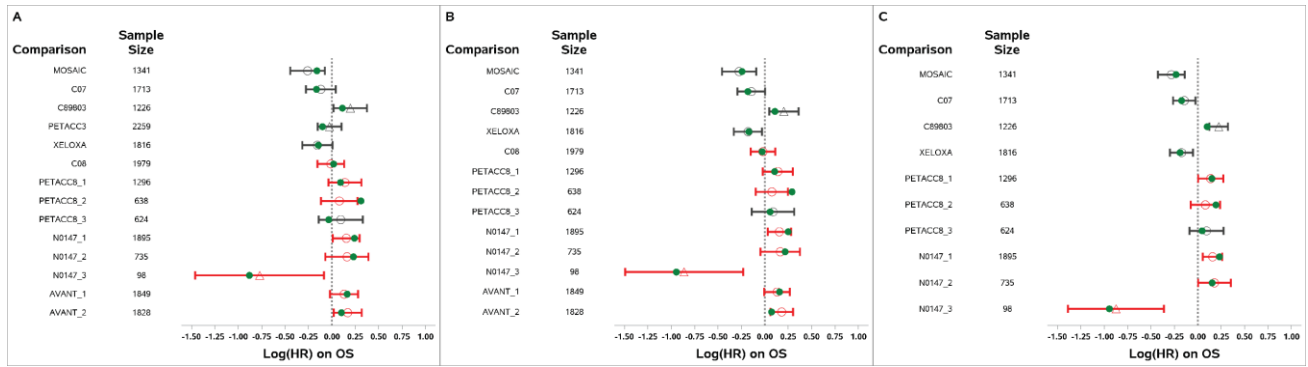

**Supplementary Figure 1. Leave-one-out cross validation.** (A) 5-year OS (B) 6-year OS (C) 6.5-year OS. Predicted mean and 95% CI of log HR of OS are provided as triangles and bars, respectively. Actual value of log HR of OS is provided as the solid circle.

Abbreviations: CI, confidence interval; HR, hazard ratio; OS, overall survival

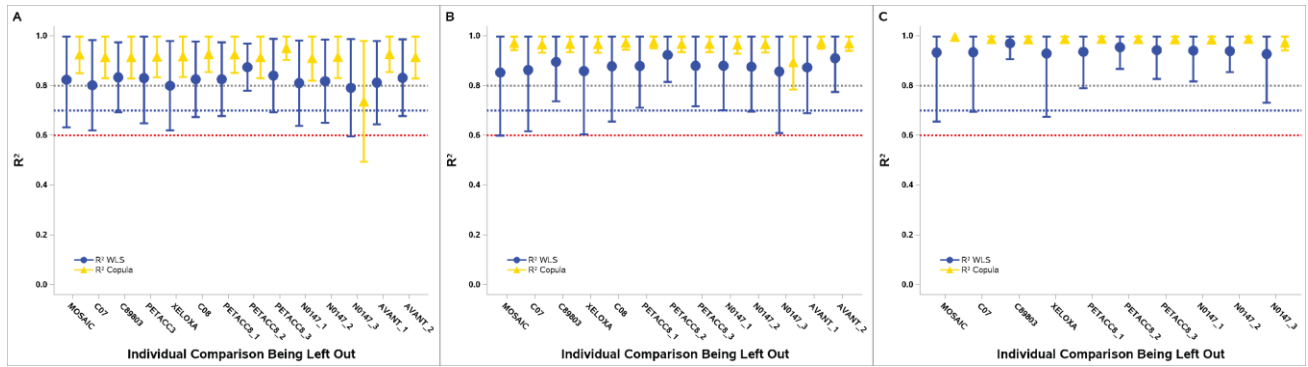

**Supplementary Figure 2. Leave-one-out re-estimation of surrogacy.** (A) 5-year OS (B) 6-year OS (C) 6.5-year OS.  $R^2_{WLS}$  and  $R^2_{Copula}$  re-estimation when removing one comparison at a time. Red line equals to  $R^2$  value of 0.6.

Abbreviations: OS, overall survival; WLS, weighted least squares
